# Supplementary material for: Botulinum toxin type-A in the prophylactic treatment of medication-overuse headache: a multicenter, double-blind, randomized, placebo-controlled, parallel group study
Source: Springer Nature journal article supplement (doi:10.1007/s10194-011-0339-z), 2011-04-15

# **Botulinum toxin type-A in the prophylactic treatment of medication-overuse headache: a multicentre, double-blind, randomized, placebo-controlled, parallel-group study.**

## **JOURNAL OF HEADACHE AND PAIN**

Giorgio Sandrini; Armando Perrotta\*; Cristina Tassorelli; Paola Torelli; Filippo Brighina; Grazia Sances; Giuseppe Nappi

\*Corresponding author

Armando Perrotta, MD, PhD

Headache Science Center, IRCCS “C. Mondino Institute of Neurology” Foundation

Via Mondino 2, 27100 Pavia, Italy

Tel.: +39 0382 380435 Fax: +39 0382 380448 E-mail: [armando.perrotta@mondino.it](mailto:armando.perrotta@mondino.it)

## **Online Resource 2**

Figure 1,2,3

Mean change ( $\pm$ SE) from baseline in headache pain intensity (Fig.1) and in disability measures Migraine Disability Assessment Scale (MIDAS) (Fig. 2) and Headache Impact Test (HIT)-6 (Fig. 3) at both 4 and 12 week after BoNTA or placebo in MOH patients with pericranial muscle tenderness.

Figure 1

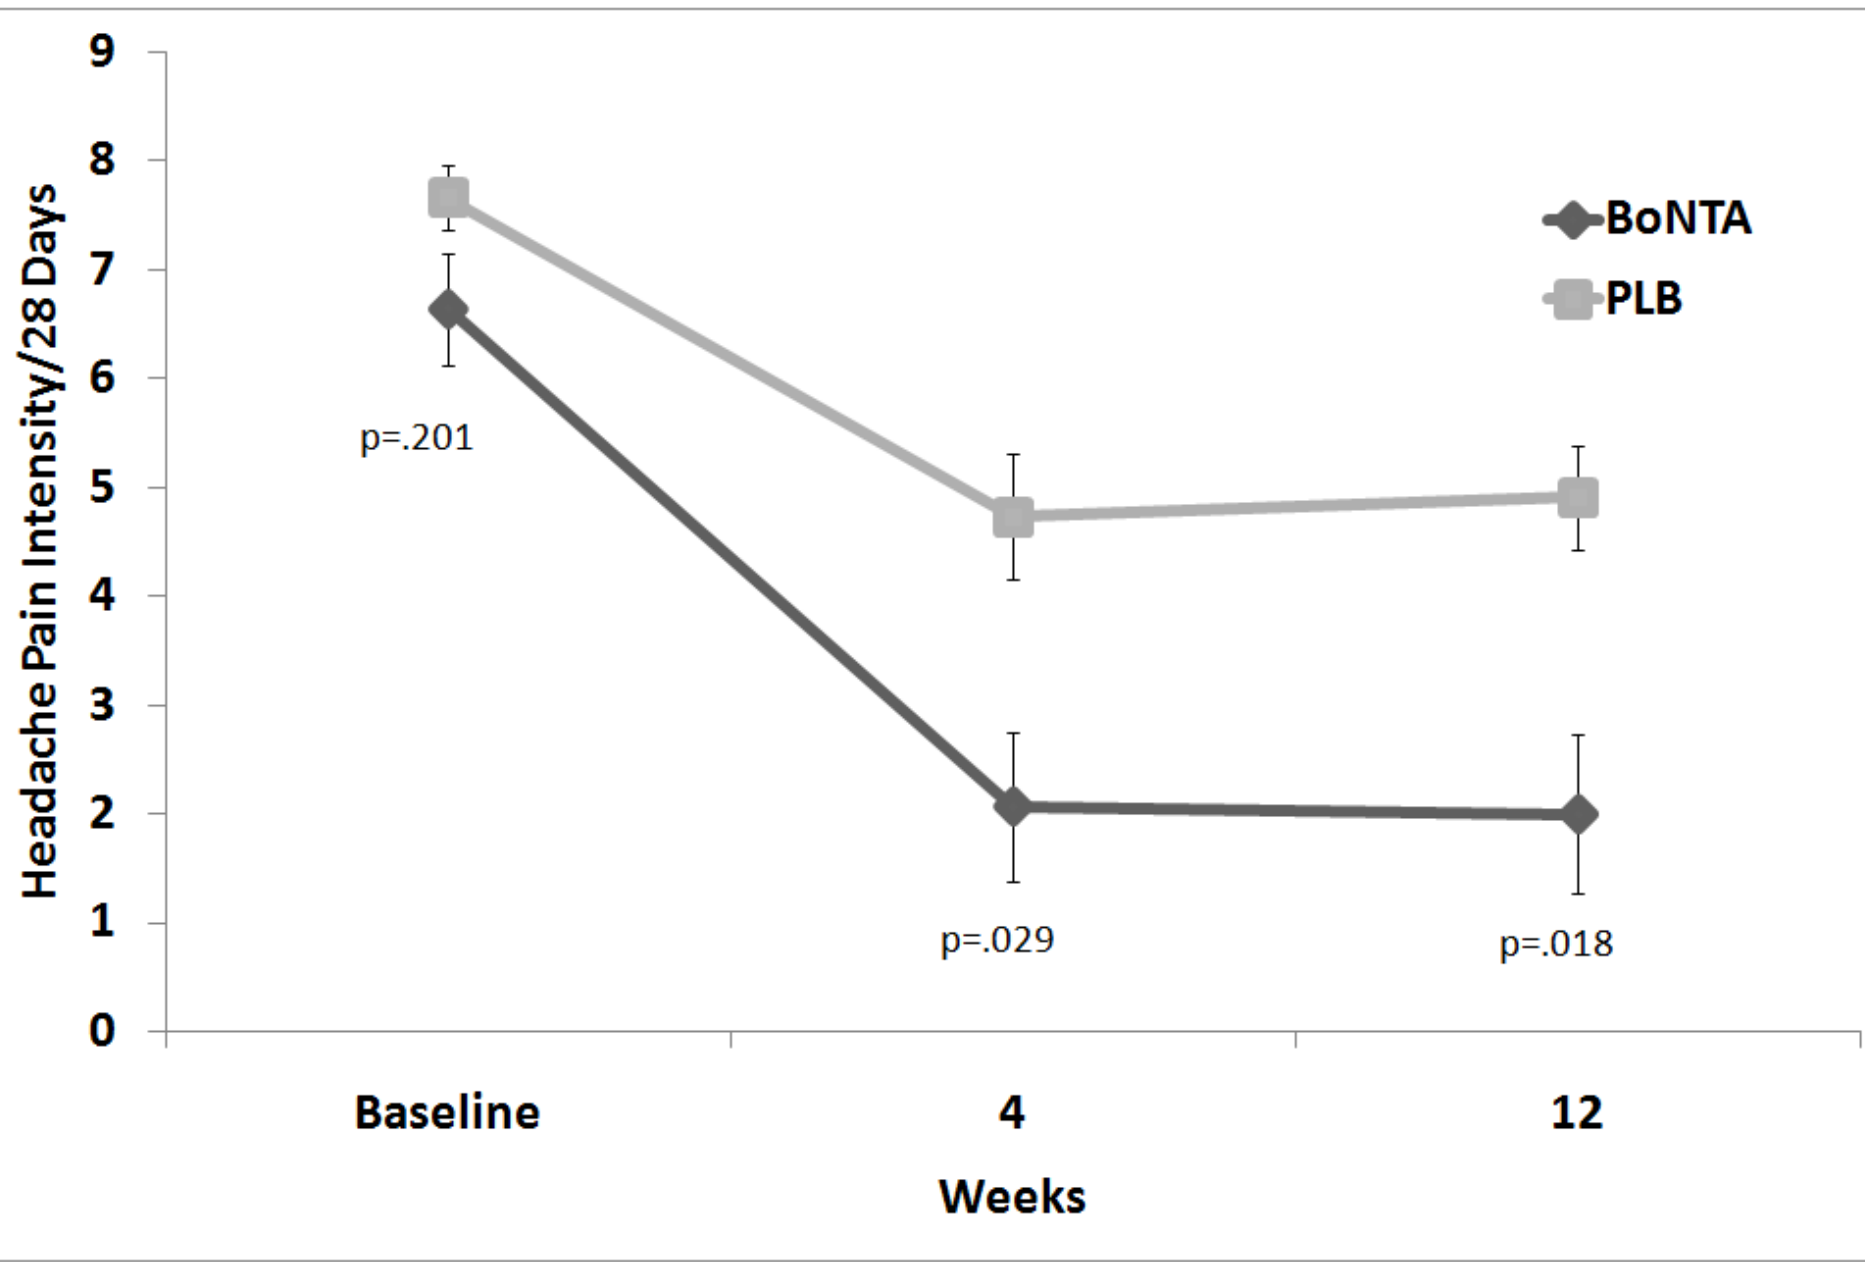

Figure 2

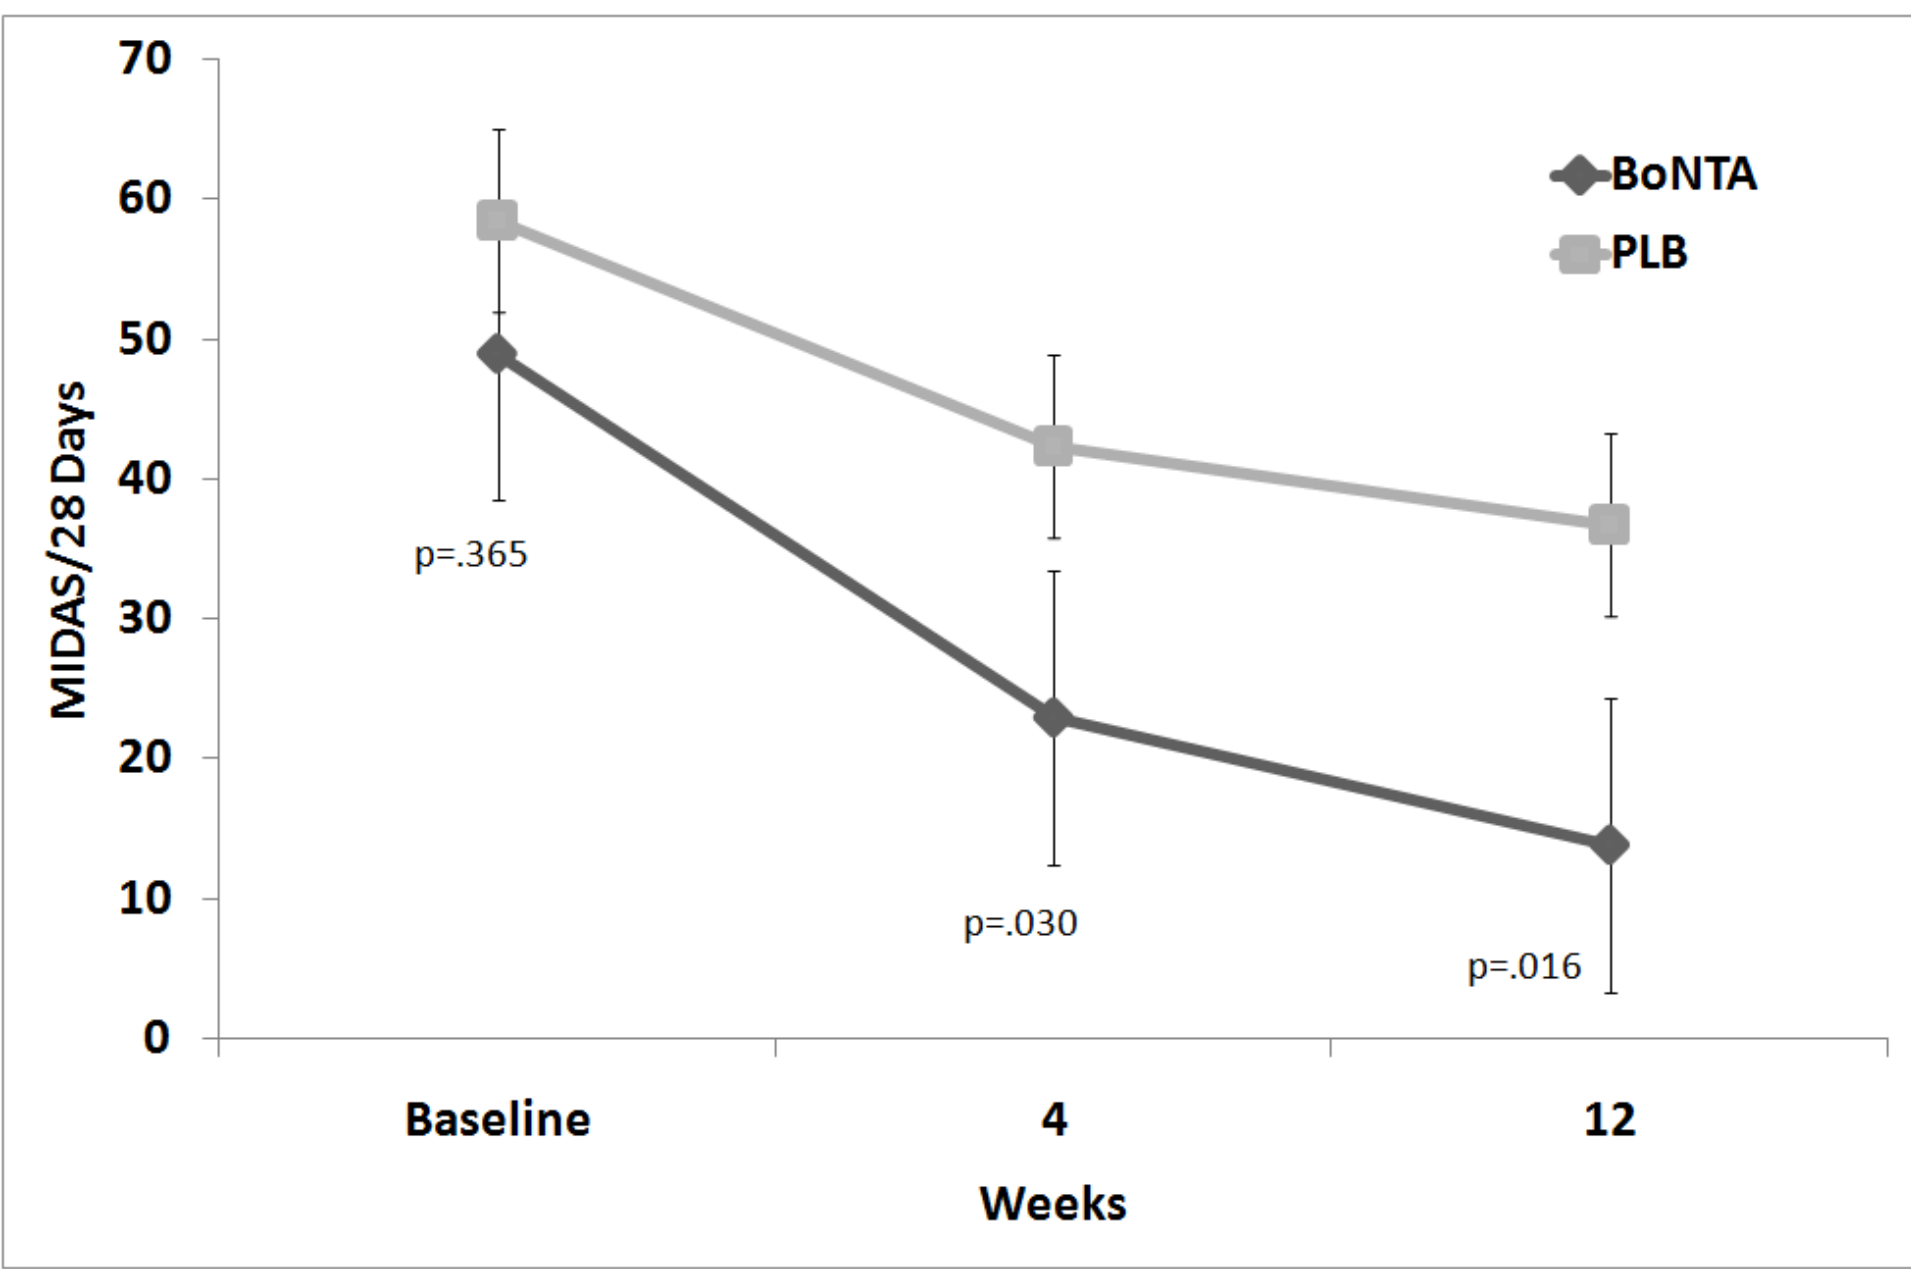

Figure 3

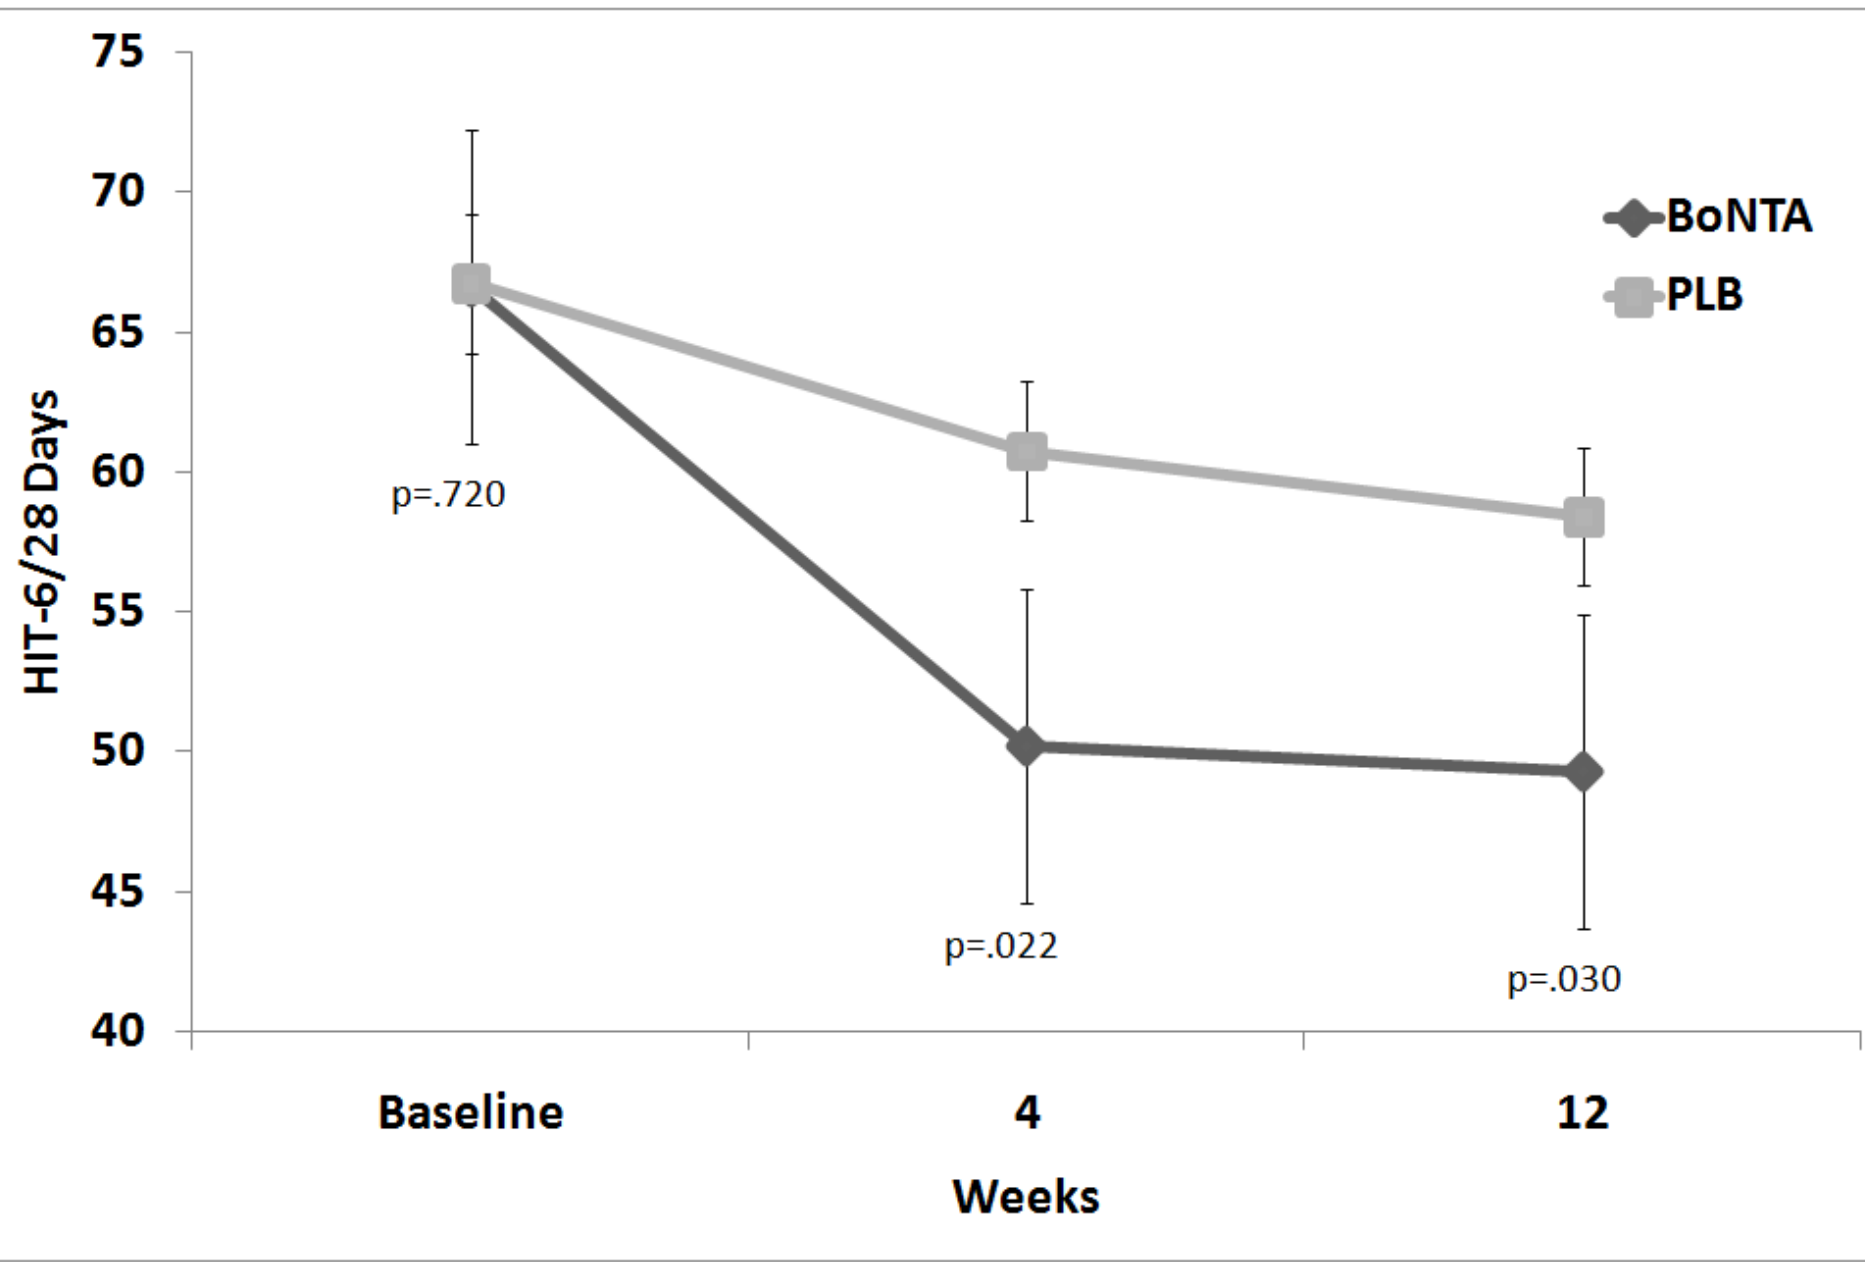

Supplement: MOESM2 [file 8768766]
